# Supplementary material
Source: Research Square preprint supplement (doi:10.21203/rs.3.rs-9702355/v1)
Supplement: Supplementary file 1 [file 9490529a20865518e0170e54.pdf]

**Supplementary file for gel image**

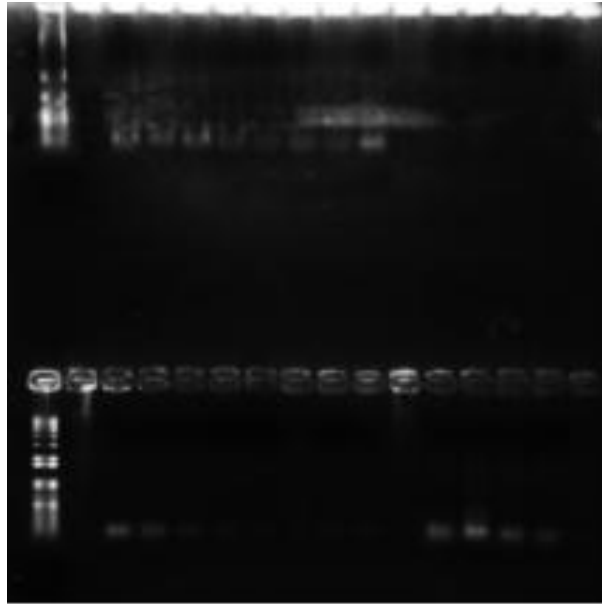

**6(a)**

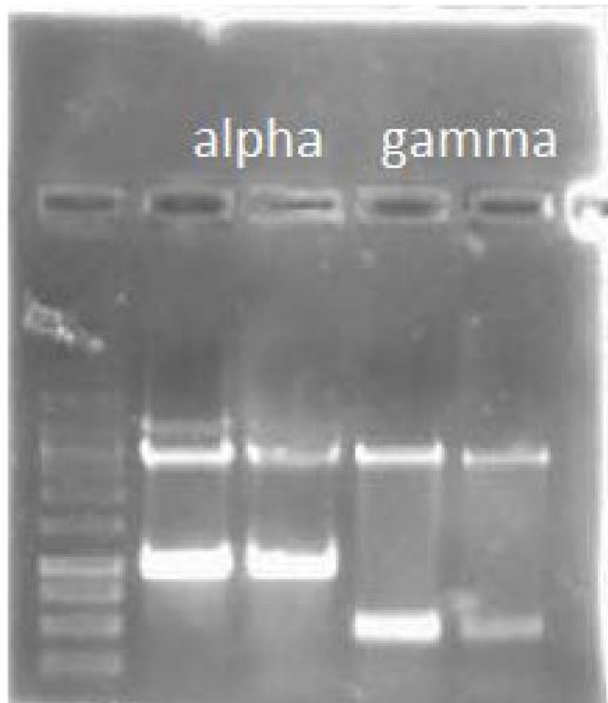

**6(b)**

Fig. 6: (a) PCR confirmation of the presence of the target gene in *Agrobacterium* LBA4404 using specific primers: Lane 3-7 for alpha zein; lane 8 to 10 for gamma zein; (b) The agarose gel after the electrophoresis of the digestion mix. Lane 1 is the ladder; Lane 2 and 3 are construct alpha, and Lane 4 and 5 are construct gamma.

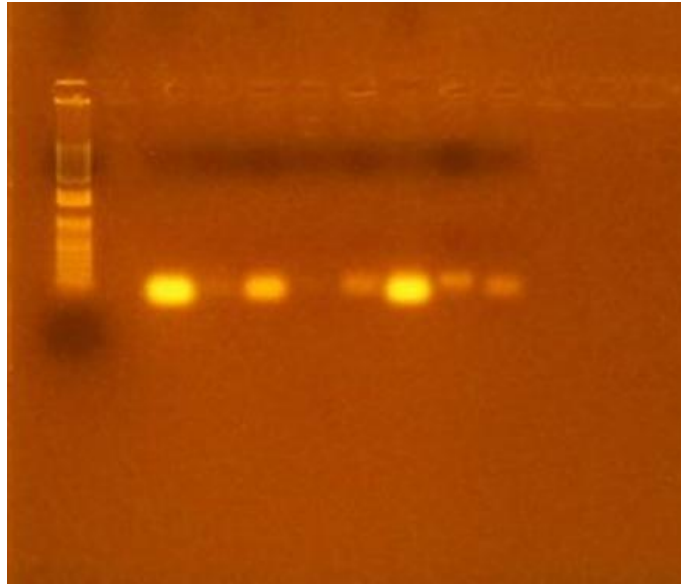

7(b)

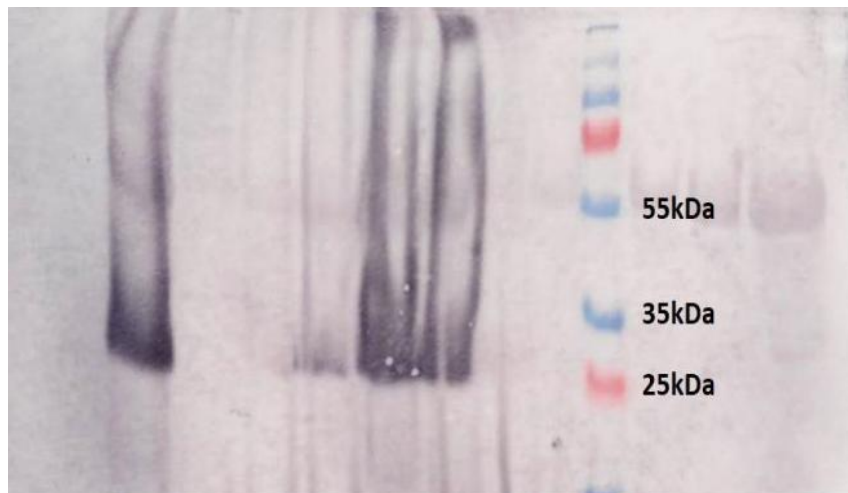

7(c)

Fig. 7: (b) PCR analysis for the amplification of alpha zein, and gamma zein gene in *L. esculentum*. In this picture lane 1=ladder 1kb. Lane 3 to 8 for alpha zein; and 10 for gamma zein gene; (c) The recombinant proteins were detected using an anti-His-tag antibody ( $\gamma$  = gamma zein fusion, and  $\alpha$  = alpha zein fusion. Ctrl=control).
